# Supplementary material
Source: MDPI journal article supplement (https://www.mdpi.com/2673-9976/4/1/9)

# Fruit-associated endophytes from olive cultivars with different levels of resistance to fruit fly and their relationship with pest infestation

**Teresa Lopes, Vitor Ramos, Cristina Cameirão, José Alberto Pereira, Paula Baptista\***

Centro de Investigação de Montanha (CIMO), Instituto Politécnico de Bragança. Campus de Santa Apolónia, 5300-253 Bragança, Portugal.

\* Corresponding author: [pbaptista@ipb.pt](mailto:pbaptista@ipb.pt)

# Abstract

Different olive cultivars exhibit different propensities to fruit fly infestation and the causes are still unclear. We want to disclose the potential role of the olive endophytes in conferring such susceptibility differences. Accordingly, the endophytic microbial composition of infested and non-infested fruits from cultivars Madural (susceptible to olive fly) and Cobrançosa (less susceptible) were studied. A culture-dependent approach was used, being the isolates identified by sequencing of their internal transcribed spacer (for fungi) and 16S rRNA gene regions (for bacteria). Overall, there was a larger consortium of bacteria associated to olives than fungi. The microbial communities were mostly composed of *Proteobacteria*, *Actinobacteria*, Ascomycota and Basidiomycota. Both host cultivar and infestation level had a negligible effect on microbial community composition. Despite this, it was found a clear positive association of microbial consortia with the resistant cultivar (*Kocuria* sp., *Actinobacterium* sp., *Rhodococcus* sp., *Pseudomonas citronellolis*, *Aspergillus flavus*, *Stereum* sp., and *Cladosporium* sp.) and non-infested fruits (*Kocuria* sp., *Stereum* sp., and *Vishniacozyma victoria*). Their function roles on host cultivar susceptibility/resistance to fruit fly is a topic that requires further studies.

**Keywords:** *Bactrocera oleae* Rossi; susceptibility of olive cultivars; bacteria; fungi; biocontrol

# Susceptibility of Olive Tree Cultivars to Olive Fly Attack

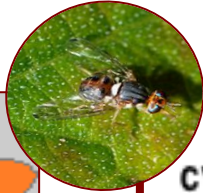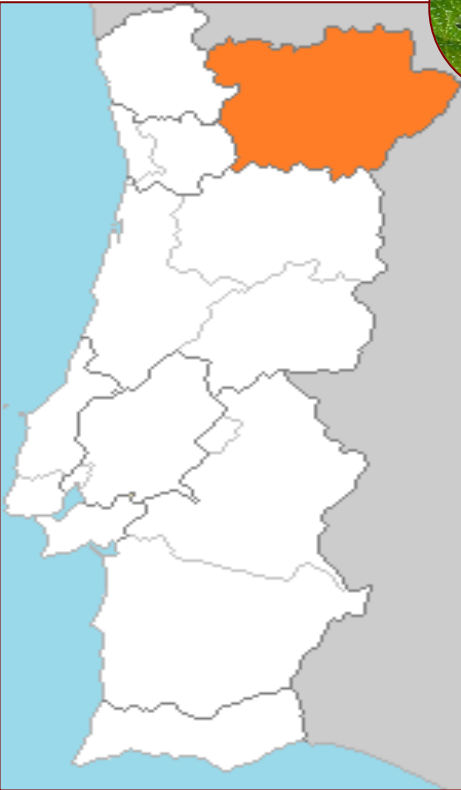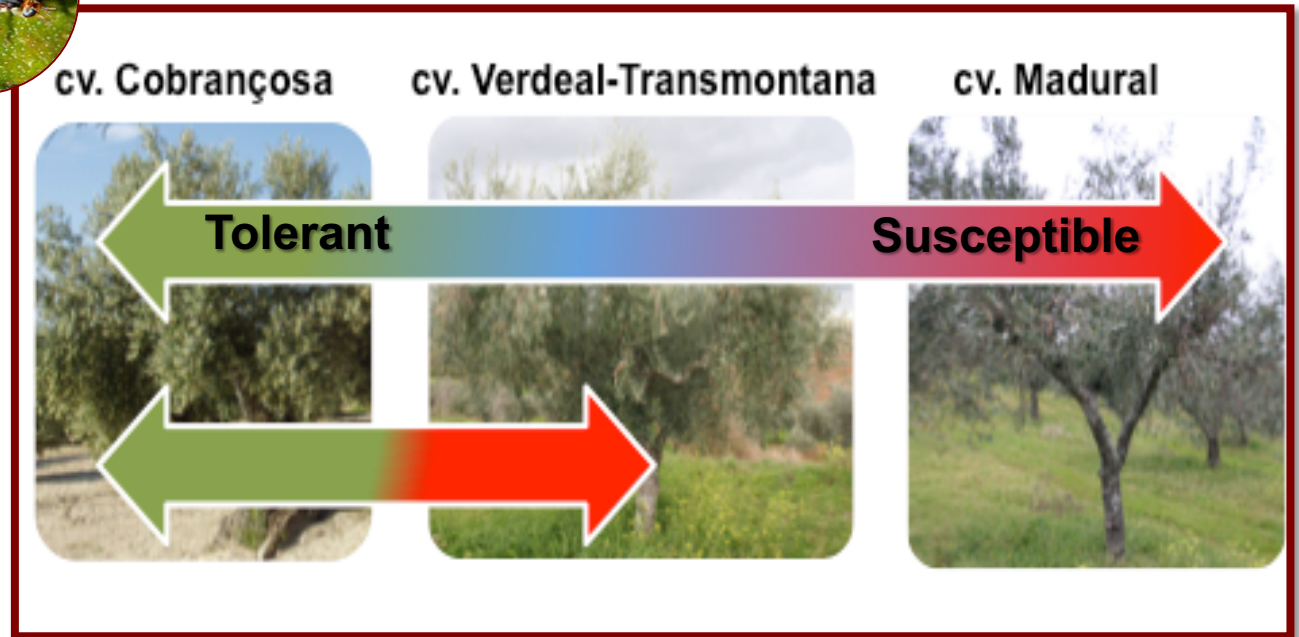

The exact reason of differences on susceptibility is currently unknown.

# Microbial diversity

a

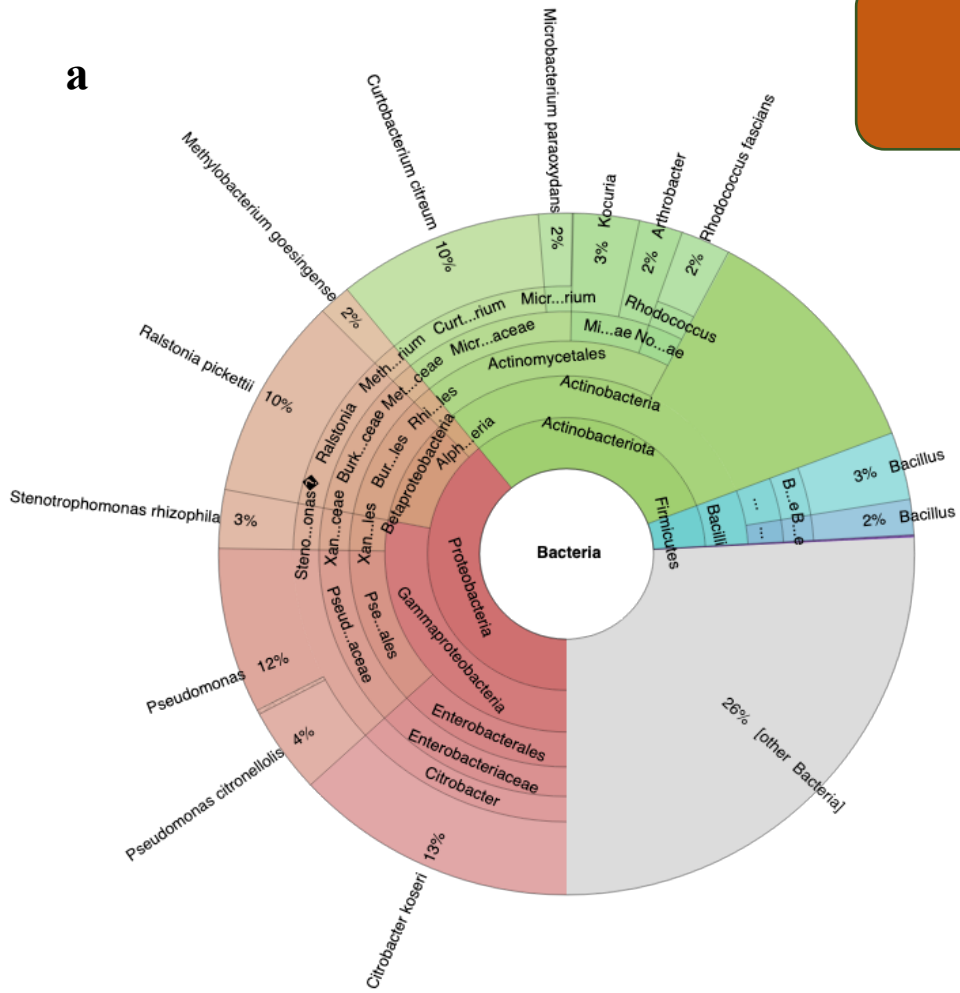

Major phyla:

- Proteobacteria and Actinobacteria
- Ascomycota and Basidiomycota.

b

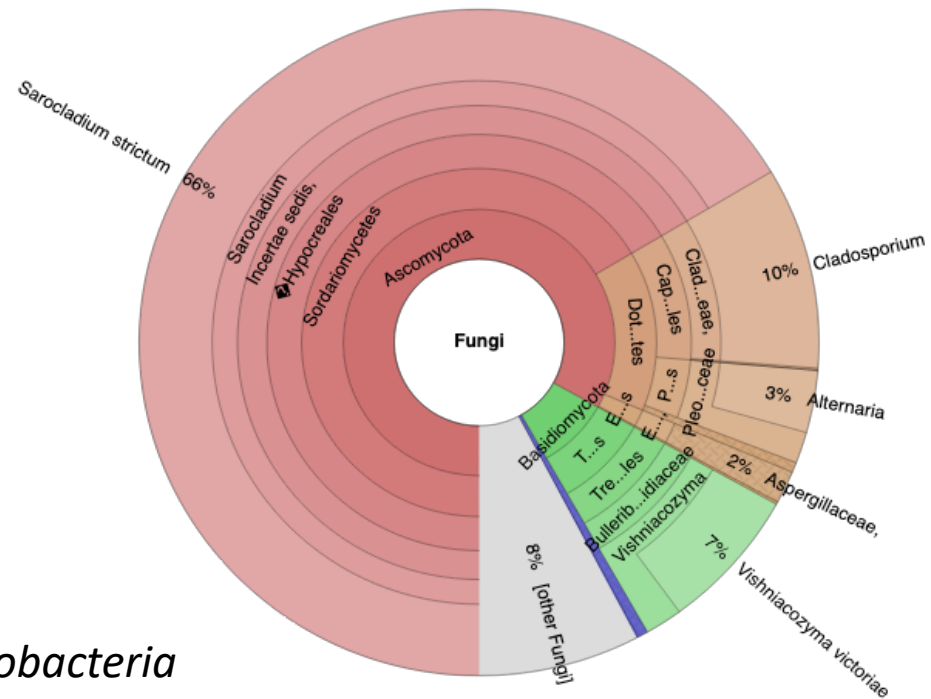

Cumulative curves reached asymptote emphasising the adequate sampling

### Bacterial Community

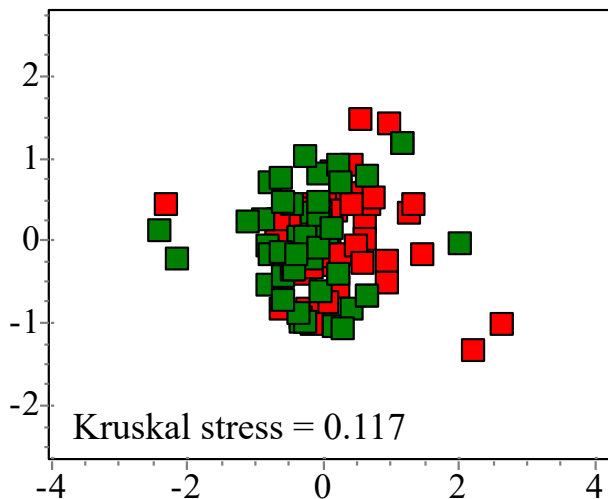

**Cobrançosa** vs. **Madural**

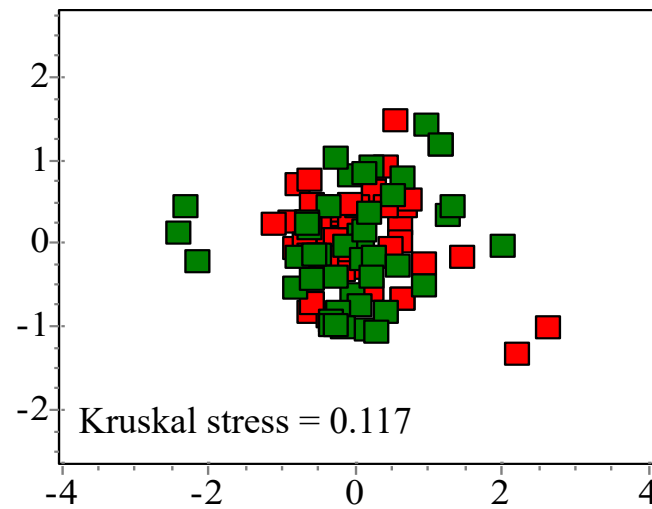

**Infested** vs. **Non infested**

|                   | ANOSIM   | PERMANOVA             |
|-------------------|----------|-----------------------|
| Cultivar          | 0.225*** | 0,021**               |
| Infestation level | 0.210*** | 0,013 <sup>n.s.</sup> |

### Fungal Community

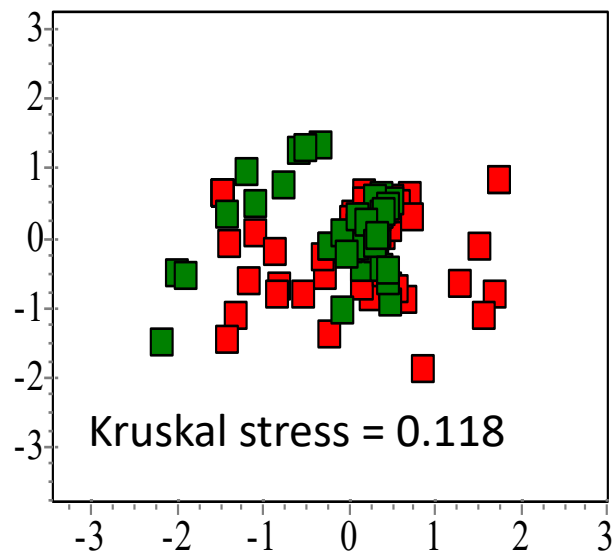

*Cobrançosa* vs. *Madural*

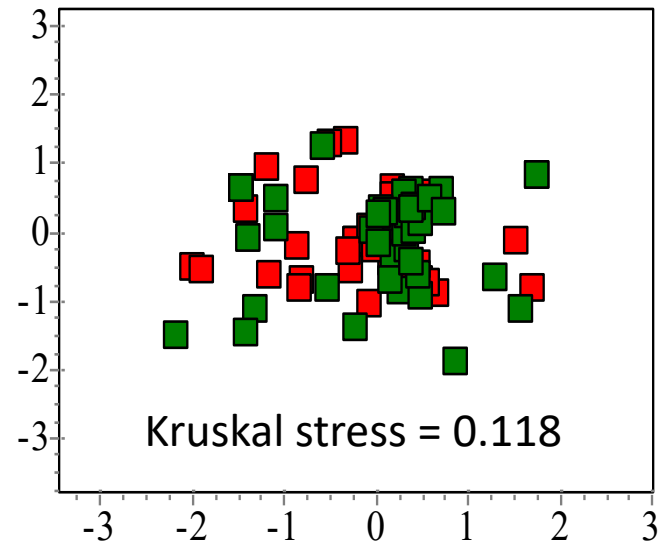

Infested vs. Non infested

|                   | ANOSIM   | PREMANOVA             |
|-------------------|----------|-----------------------|
| Cultivar          | 0.216*** | 0,023**               |
| Infestation level | 0.189*** | 0,012 <sup>n.s.</sup> |



# Olive fruit endophytes

## Bacteria

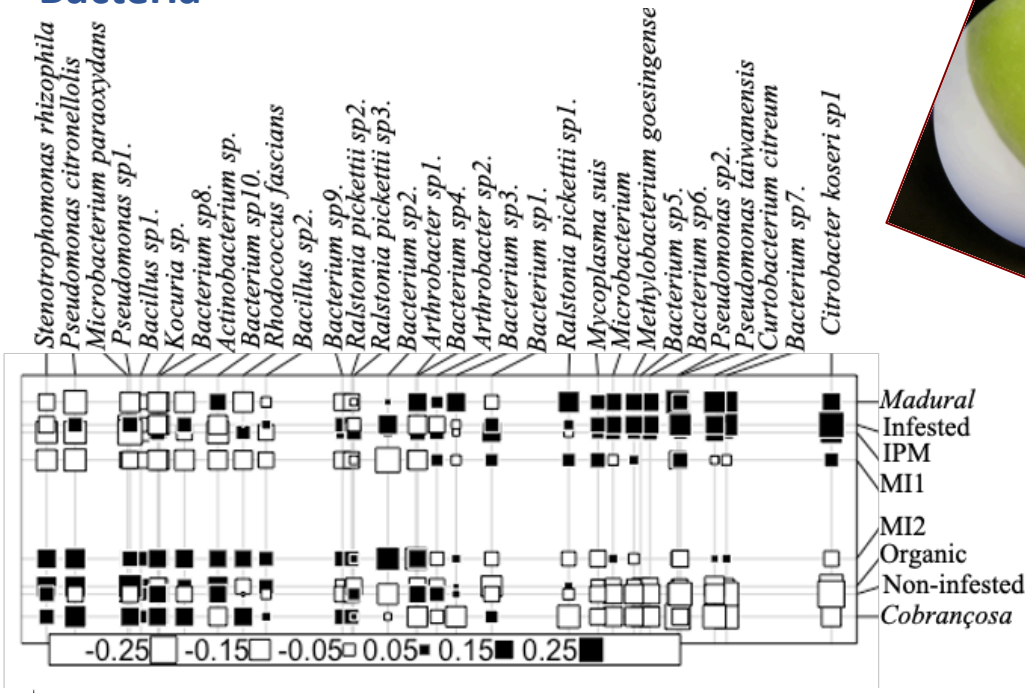

## Fungi

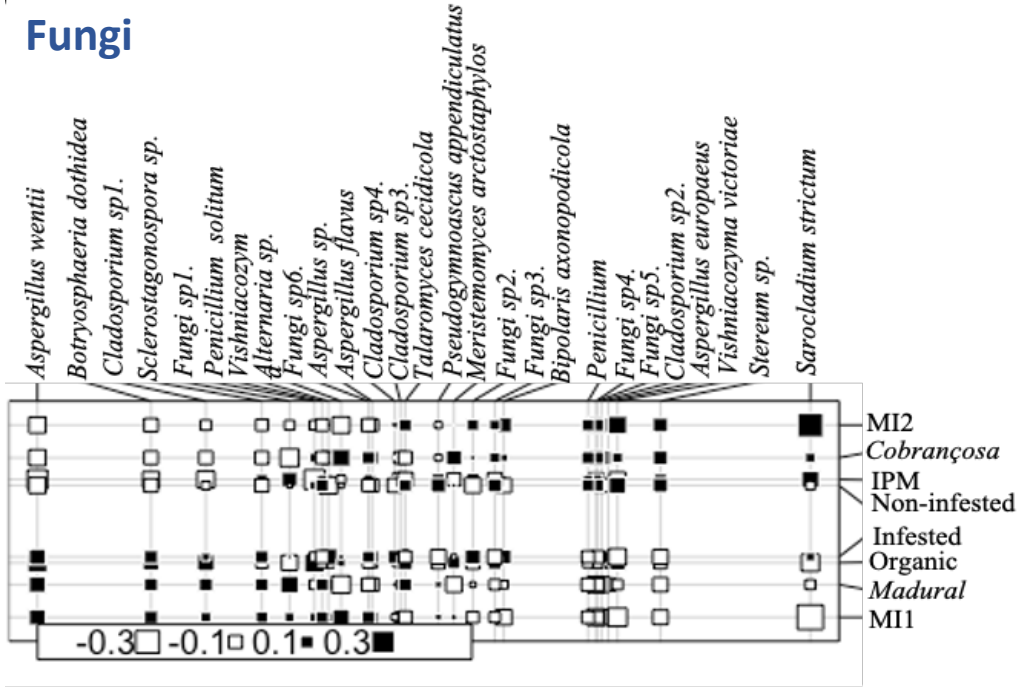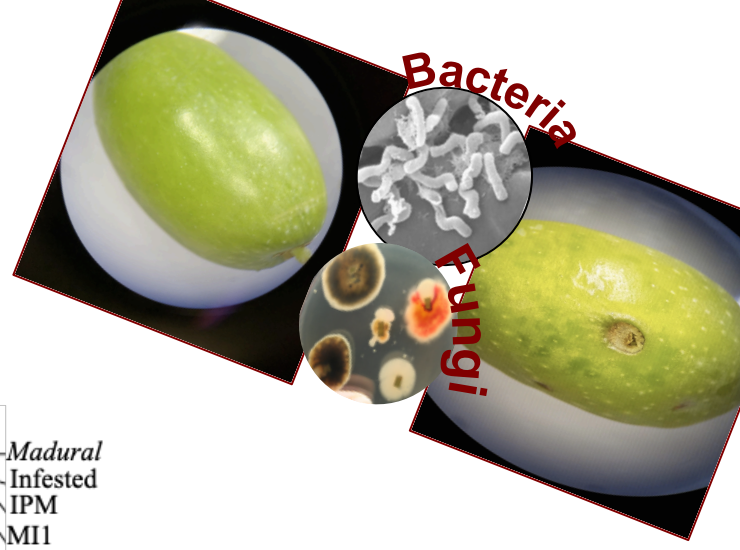

# Olive fruit endophytes

*Kocuria sp.*  
*Actinobacterium sp.*  
*Rhodococcus sp.*  
*Pseudomonas citronellolis*  
*Aspergillus flavus*  
*Stereum sp.*  
*Cladosporium sp.*

positively correlated  
with  
cv. *Cobrançosa*

*Kocuria sp.*  
*Stereum sp.*  
*Vishniacozyma victoria*

positively correlated  
with  
non-infested fruits

*Pseudomonas sp.*  
*Curtobacterium citreum*  
*Ralstonia pickettii*  
*Aspergillus wentii*

positively correlated  
with  
cv. *Madural*

*Citrobacter koseri*  
*Alternaria sp.*  
*Sarocladium strictum*

positively correlated  
with  
infested fruits

## What can they do?

Most species are plant pathogen but some are able to promote plant growth and promote disease resistance.

## Could they be useful?

*Kocuria sp.*, *P. citronellolis* & *V. victoria* are potential olive biocontrol agents.



- ❑ No significant differences among the two types of cultivar and infestation level.
- ❑ Cultivar influences 2.1% and 2.3% of the bacterial and fungal composition respectively.
- ❑ *Kocuria sp.*, *P. citronellolis* & *V. Victoria* are found to be endophytes with potential biocontrol activities in olive tree. However future studies must be done to confirm.

# ACKNOWLEDGEMENTS

This work is supported by FEDER funds through the COMPETE (Operational Programme for Competitiveness Factors) and by National funds through the FCT (Foundation for Science and Technology) within the POCI-01-0145-FEDER-031133 (MicOlives) project.

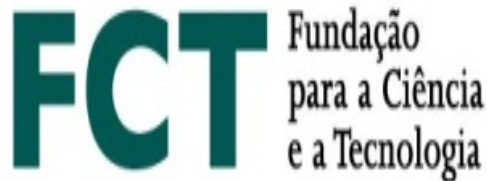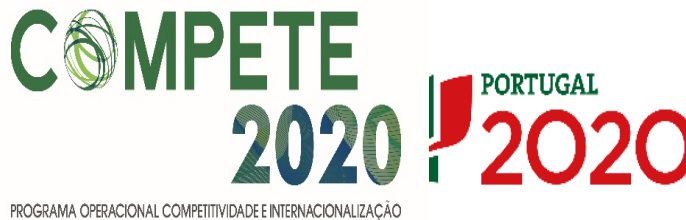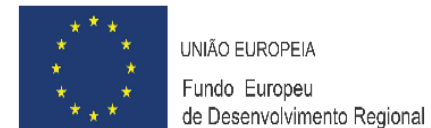

Supplement: s1 [file s1]
